# Supplementary material for: Aggregation behavior of group 12 complexes of a tripodal mixed NS(thiolato) donor ligand
Source: Royal Society of Chemistry journal article supplement (doi:10.1039/d3nj05532a), 2024-01-01
Supplement: d3nj05532a1.pdf [file d3nj05532a1.pdf]

## Aggregation behavior of group 12 complexes of a tripodal mixed NS(thiolato) donor ligand

Michelle A. Sturner,<sup>a</sup> Isla D. Thomas,<sup>a</sup> Joshua E. Owusu-Koramoah,<sup>a</sup> Todd M. Reynolds,<sup>a</sup> Steven M. Berry,<sup>a,b</sup> Raymond J. Butcher,<sup>c</sup> Deborah C. Bebout \*<sup>a</sup>

<sup>a</sup> Department of Chemistry, William & Mary, Williamsburg, VA, United States

<sup>b</sup> Current address: Department of Chemistry & Biochemistry, University of Minnesota – Duluth, Duluth, MN, United States

<sup>c</sup> Department of Chemistry, Howard University, Washington D.C., United States

\* E-mail: [dcbebo@wm.edu](mailto:dcbebo@wm.edu)

## ELECTRONIC SUPPLEMENTARY INFORMATION

| Table of Contents with Abbreviated Descriptions                                                                                                                       | Page |
|-----------------------------------------------------------------------------------------------------------------------------------------------------------------------|------|
| Additional Experimental Details                                                                                                                                       | S2   |
| Brief overview of the structures of additional solvates of <b>1</b>                                                                                                   | S2   |
| <b>Table S1.</b> Crystallographic data for additional <b>1</b> solvates                                                                                               | S3   |
| <b>Table S2.</b> Selected bond lengths and angles for additional [CdLCl] <sub>2</sub> solvates.                                                                       | S4   |
| <b>Figure S1.</b> Packing diagram of <b>1</b> along <i>b</i> *                                                                                                        | S5   |
| <b>Figure S2.</b> Packing diagram of <b>2</b> along <i>b</i>                                                                                                          | S6   |
| <b>Figure S3.</b> Aromatic ring distances for [ZnLCl] ( <b>3</b> )                                                                                                    | S7   |
| <b>Figure S4.</b> Overlay of H <sub>a</sub> resonance for <b>2</b> at 60 °C & -40 °C                                                                                  | S8   |
| <b>Figure S5.</b> Ethylene proton NMR highlights for <b>2</b>                                                                                                         | S8   |
| <b>Figure S6.</b> Calculated and observed isotope patterns for [Cd <sub>x</sub> L <sub>y</sub> Cl <sub>z</sub> ] and [Hg <sub>x</sub> L <sub>y</sub> C <sub>z</sub> ] | S9   |
| <b>Figure S7.</b> Collision energy plots for [M <sub>2</sub> L <sub>2</sub> Cl] <sup>+</sup>                                                                          | S10  |
| <b>References</b>                                                                                                                                                     | S11  |

## Additional Experimental Details

**Crystallization of additional solvates of 1.** One equivalent of CdCl<sub>2</sub> (50 mM in MeOH, 10 mL, 50 mmol) was added dropwise to a stirred solution containing 2.5 mL MeOH, NaOH (0.2 M in MeOH, 2.5 mL, 50 mmol) and LH (0.1 M in MeOH, 5.0 mL, 50 mmol). Transient cloudiness occurred during the addition. The solution was divided into 1 mL aliquots. Various cosolvents (0.2, 0.5 and 1.0 mL) were mixed with each aliquot before setting aside for slow evaporation. After three weeks, diffraction quality crystals were obtained in low yield of **1**·m-xylene with m-xylene as cosolvent and of **1**·MeOH with ethyl acetate as the cosolvent. Both crystals became opaque when vacuum dried.

**Single Crystal Diffraction of additional solvates of 1.** Single crystal diffraction data for additional solvates were collected using graphite-monochromated Mo K $\alpha$  X-radiation ( $\lambda = 0.71073$  Å) on a Bruker D8 Venture Photon 3. The structures were solved by intrinsic phasing and refined on  $F^2$  by full-matrix least squares using the ShelXle 2019/3 program package.<sup>1</sup> All non-hydrogen atoms were refined anisotropically and the hydrogens were placed theoretically. Crystallographic data for **1**·m-xylene and **1**·MeOH are provided in Table S1. Selected bond distances and angles are provided in Table S2.

### Brief overview of the structures of additional solvates of 1

The neutral dinuclear complex [CdLCl]<sub>2</sub>·m-xylene (**1**·m-xylene) crystallized in the triclinic space group  $P-1$  with one dimeric complex and one disordered m-xylene molecule per unit cell. Both the complex and the m-xylene molecule lie on crystallographic inversion centers. Although not isomorphic, bond distances and bond angles for **1** are comparable in the m-xylene (Table S2) and benzene (Table 4) solvates. The distorted envelope ring conformations have matching flap positions.

The neutral dinuclear complex [CdLCl]<sub>2</sub>·MeOH (**1**·MeOH) crystallized in the monoclinic space group  $C2/c$  with one dimeric complex and one disordered methanol molecule per unit cell. The complex lies on a crystallographic inversion center and the methanol lies on a  $C_2$  axis. Bond distances and bond angles for **1**·MeOH (Table S2) are comparable to the other two solvates of **1**. The distorted envelope ring conformations also have matching flap positions.

**Table S1.** Crystallographic data for additional [CdLCl]<sub>2</sub> solvates.

| Solvate                                                         | m-xylene                                                                                      | MeOH                                                                                           |
|-----------------------------------------------------------------|-----------------------------------------------------------------------------------------------|------------------------------------------------------------------------------------------------|
| Empirical Formula                                               | C <sub>36</sub> H <sub>42</sub> Cd <sub>2</sub> Cl <sub>2</sub> N <sub>6</sub> S <sub>2</sub> | C <sub>29</sub> H <sub>36</sub> Cd <sub>2</sub> Cl <sub>2</sub> N <sub>6</sub> OS <sub>2</sub> |
| Formula mass [g mol <sup>-1</sup> ]                             | 918.57                                                                                        | 844.46                                                                                         |
| Crystal Size [mm <sup>3</sup> ]                                 | 0.147 × 0.144 × 0.131                                                                         | 0.191 × 0.140 × 0.063                                                                          |
| Crystal System                                                  | Triclinic                                                                                     | Monoclinic                                                                                     |
| Space Group                                                     | <i>P</i> -1                                                                                   | <i>C</i> 2/ <i>c</i>                                                                           |
| <i>a</i> [Å]                                                    | 9.5643(6)                                                                                     | 21.3846(7)                                                                                     |
| <i>b</i> [Å]                                                    | 9.6576(6)                                                                                     | 9.4379(3)                                                                                      |
| <i>c</i> [Å]                                                    | 11.1260(7)                                                                                    | 16.6623(5)                                                                                     |
| α [°]                                                           | 104.832(2)                                                                                    | 90                                                                                             |
| β [°]                                                           | 105.857(2)                                                                                    | 101.6100(10)                                                                                   |
| γ [°]                                                           | 91.085(2)                                                                                     | 90                                                                                             |
| V [Å <sup>3</sup> ]                                             | 951.27(10)                                                                                    | 3294.08(18)                                                                                    |
| Z                                                               | 1                                                                                             | 4                                                                                              |
| Radiation (monochromatic)                                       | Mo Kα                                                                                         | Mo Kα                                                                                          |
| T [K]                                                           | 133(2)                                                                                        | 100(2)                                                                                         |
| ρ <sub>calc</sub> [Mg m <sup>-3</sup> ]                         | 1.603                                                                                         | 1.703                                                                                          |
| λ [Å]                                                           | 0.71073                                                                                       | 0.71073                                                                                        |
| μ [mm <sup>-1</sup> ]                                           | 1.402                                                                                         | 1.613                                                                                          |
| Measured reflections                                            | 55715                                                                                         | 42613                                                                                          |
| Ind. Reflections [R <sub>(int)</sub> ]                          | 3739 [0.0399]                                                                                 | 3252 [0.0510]                                                                                  |
| Completeness to θ = 25.242°                                     | 99.3%                                                                                         | 100.0%                                                                                         |
| Data/restraints/parameters                                      | 3739 / 0 / 255                                                                                | 3252 / 177 / 200                                                                               |
| R1 <sup>a</sup> , wR2 <sup>b</sup> [ <i>I</i> > 2σ( <i>I</i> )] | 0.0140, 0.0363                                                                                | 0.0280, 0.0647                                                                                 |
| R1 <sup>a</sup> , wR2 <sup>b</sup> (all data)                   | 0.0144, 0.0365                                                                                | 0.0309, 0.0662                                                                                 |
| Goodness-of-fit (GOF)                                           | 1.053                                                                                         | 1.128                                                                                          |

<sup>a</sup>  $R_1 = \frac{\sum ||F_o| - |F_c||}{\sum |F_o|}$ , and  $S = \frac{[\sum [w(F_o^2 - F_c^2)^2]/(n - p)]^{1/2}}{[\sum [w(F_o^2) - (F_c^2)]^2/\sum [w(F_o^2)^2]^{1/2}}$ ; <sup>b</sup>  $wR_2 = \frac{[\sum [w(F_o^2) - (F_c^2)]^2/\sum [w(F_o^2)^2]^{1/2}]^{1/2}}{[\sum [w(F_o^2) - (F_c^2)]^2/\sum [w(F_o^2)^2]^{1/2}]^{1/2}}$

**Table S2.** Selected bond lengths and angles for additional [CdLCl]<sub>2</sub> solvates.

| Solvate   | m-xylene    | methanol  |
|-----------|-------------|-----------|
| M–N1A     | 2.4137(11)  | 2.396(3)  |
| M–N1B     | 2.4519(12)  | 2.417(2)  |
| M–N       | 2.4742(11)  | 2.493(3)  |
| M–S       | 2.6343(4)   | 2.6309(8) |
| M–Cl      | 2.5010(3)   | 2.5327(8) |
| M–S#1     | 2.6627(4)   | 2.6490(8) |
| N1A–M–N1B | 87.63(4)    | 91.43(8)  |
| N1A–M–N   | 69.41(4)    | 68.20(9)  |
| N1B–M–N   | 70.61(4)    | 71.09(8)  |
| N1A–M–Cl  | 96.98(3)    | 95.42(7)  |
| N1B–M–Cl  | 91.25(3)    | 90.16(7)  |
| N–M–Cl    | 157.22(3)   | 154.09(6) |
| N1A–M–S   | 149.01(3)   | 148.13(7) |
| N1B–M–S   | 85.87(3)    | 83.80(6)  |
| N–M–S     | 79.86(3)    | 80.51(6)  |
| Cl–M–S    | 113.412(12) | 116.03(3) |
| N1B–M–S#1 | 165.44(3)   | 165.66(7) |
| N1A–M–S#1 | 90.21(3)    | 86.21(6)  |
| N–M–S#1   | 95.16(3)    | 94.96(6)  |
| Cl–M–S#1  | 103.306(12) | 104.13(3) |
| S–M–S#1   | 88.608(11)  | 90.75(2)  |
| M–S–M#1   | 91.393(11)  | 89.26(2)  |

m-xylene solvate symmetry code: #1:  $-x + 2, -y + 1, -z + 1$ ; methanol solvate symmetry code:  
#1:  $-x + 3/2, -y + 1/2, -z + 1$

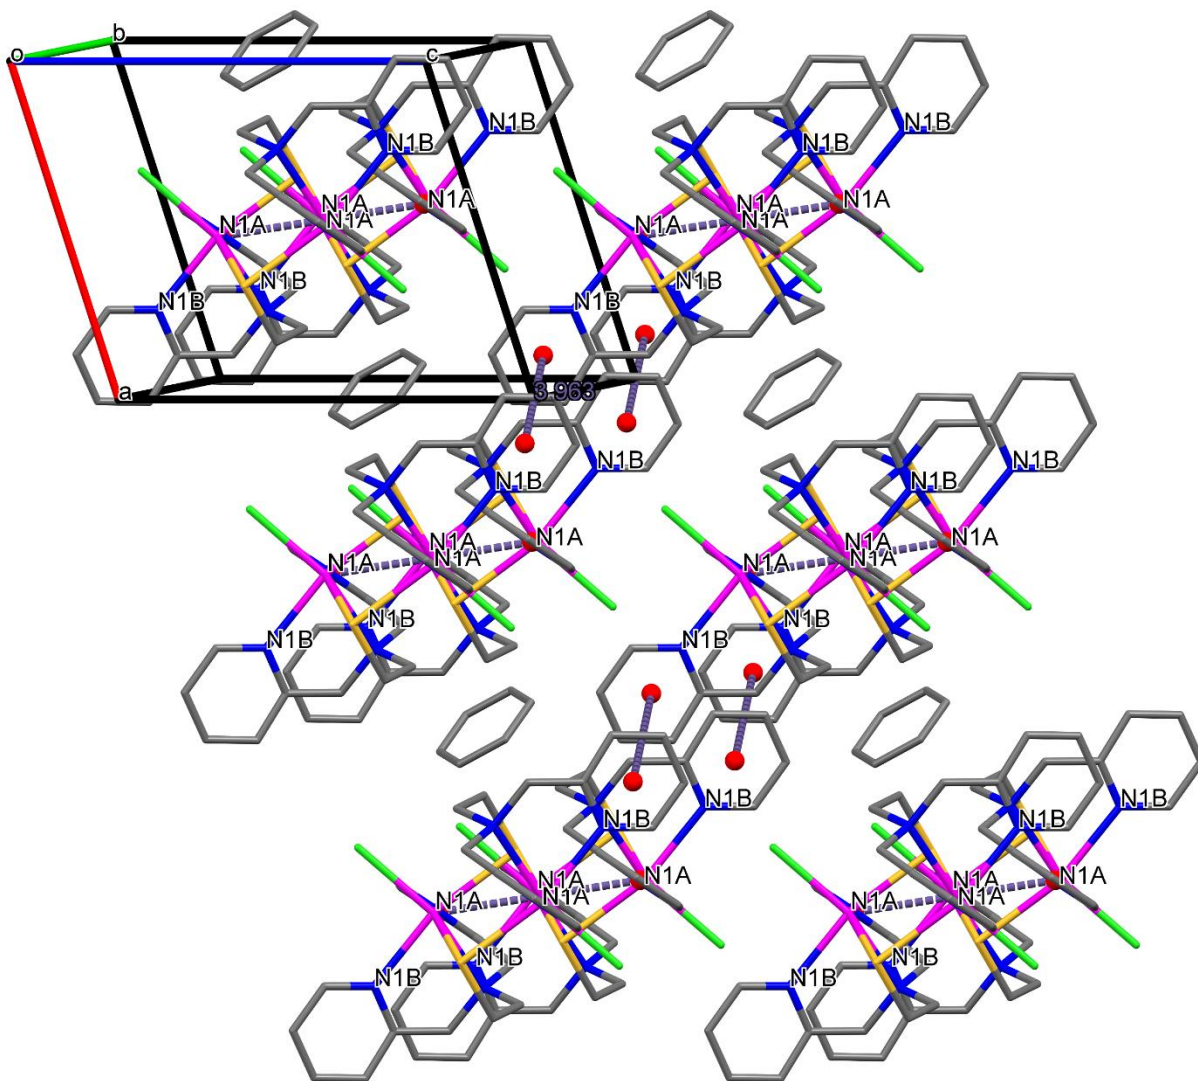

**Figure S1.** Stacking diagram of **1** along  $b^*$  showing formation of sheets through pairwise N1A pyridyl (5.198 Å centroid–centroid separation; 3.526 Å normal separation) and N1B pyridyl (3.963 Å centroid–centroid separation; 3.297 Å normal separation) offset face-to-face interactions<sup>2</sup> or C–H  $\pi$  attractions.<sup>3</sup> Benzene molecules are located between sheets and potentially involved in a weak multimolecular embrace with four neighboring N1A pyridyl rings.<sup>4</sup> Hydrogen atoms omitted for clarity.

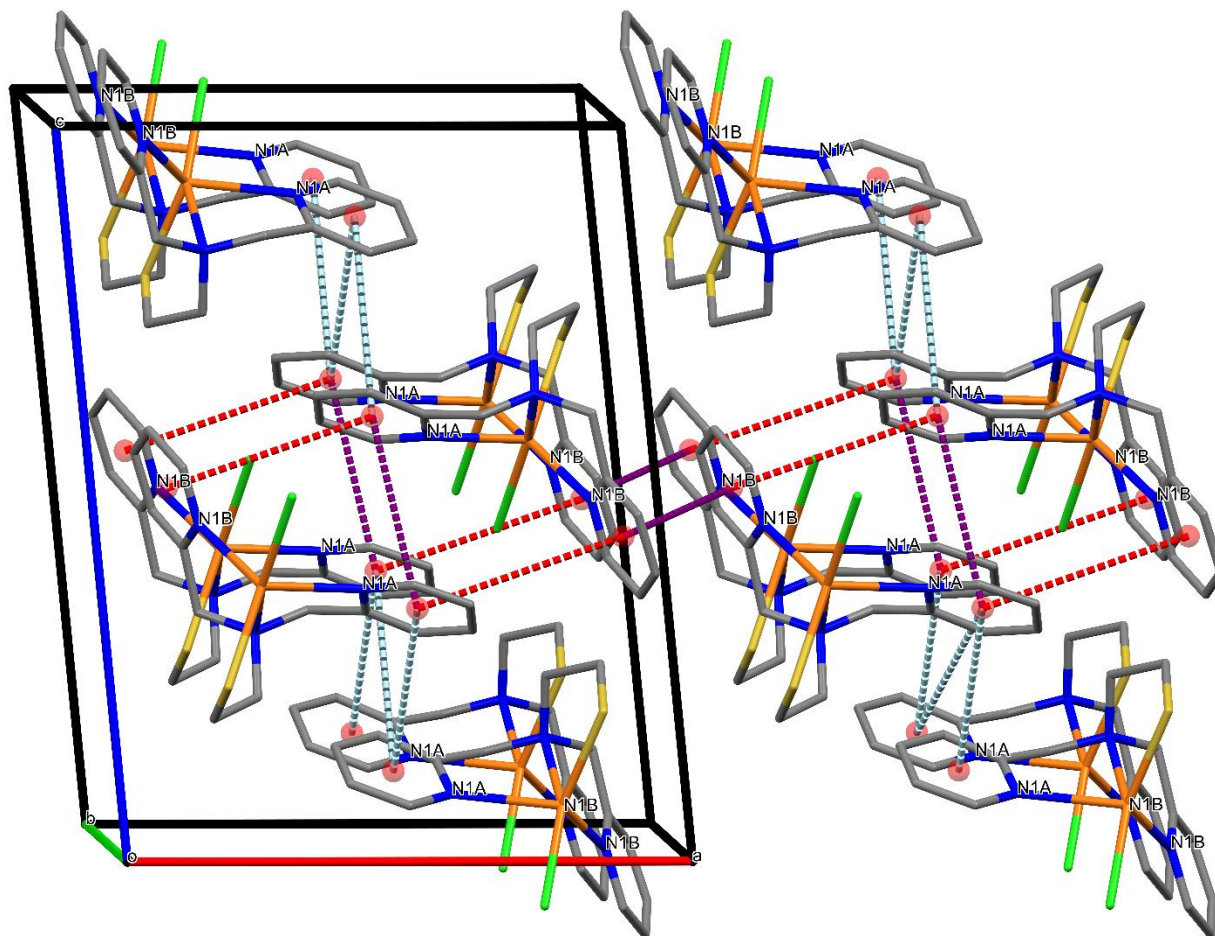

**Figure S2.** Stacking diagram of **2** along *b* showing formation of strands along the *a* direction through pairwise N1B (3.598 Å centroid–centroid separation; 3.349 Å normal separation) and N1A (4.385 Å centroid–centroid separation; 3.884 Å normal separation) pyridyl ring OFF interactions as well as EF interactions between N1A and N1B pyridyl rings (4.811 Å centroid–centroid separation; 4.391 Å normal separation).<sup>2,5</sup> The chains are networked with their neighbors through a zig-zag aryl embrace between N1A pyridyl rings (5.554 Å centroid–centroid separation; 5.183 Å normal separation).<sup>4</sup> Hydrogen atoms omitted for clarity. OFF in violet; EF in red; aryl embrace EF interactions in light blue.

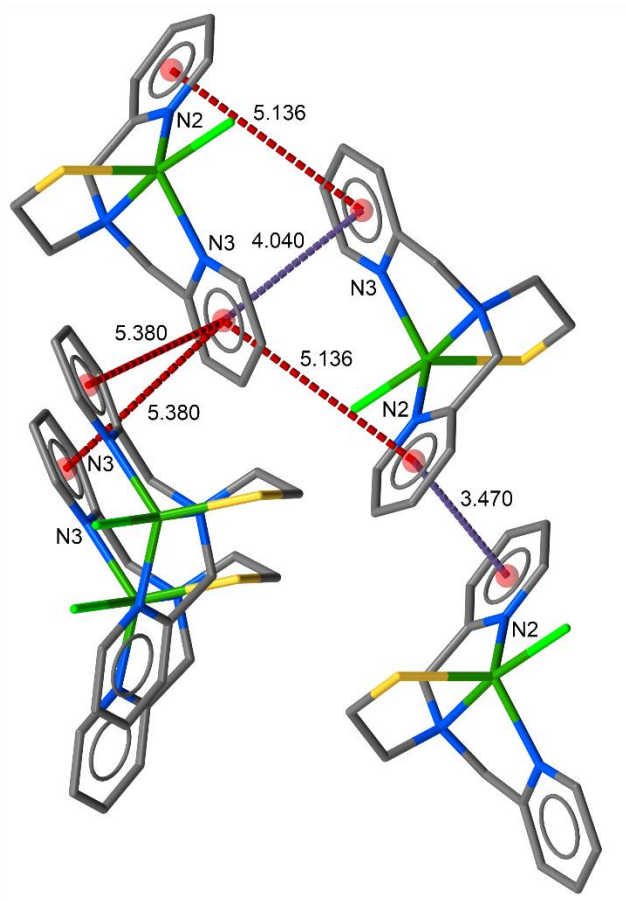

**Figure S3.** Intermolecular aromatic distances (Å) between pyridyl rings, identified by their nitrogen atoms, in **3** (CDC Refcode XALTEJ) <sup>6</sup>. Hydrogen atoms are omitted for clarity. OFF in violet; EF in red.

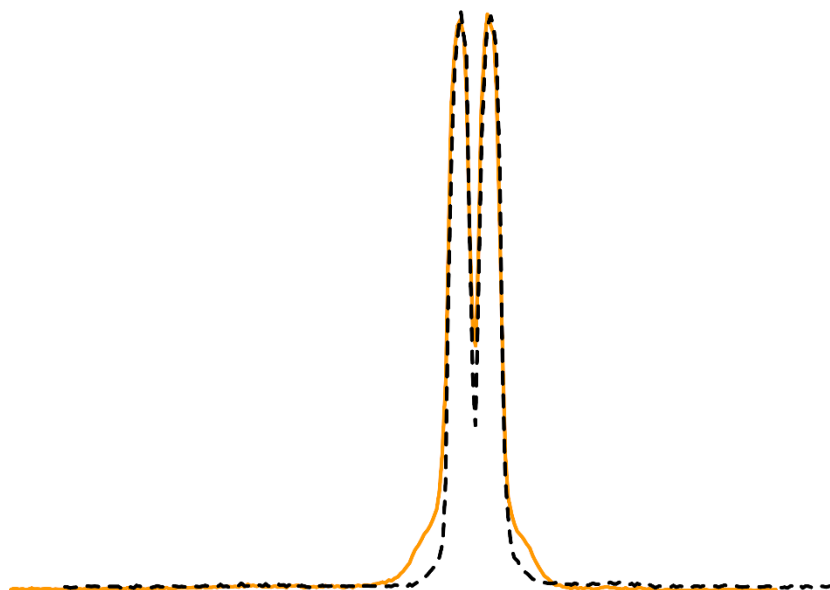

**Figure S4.** Overlay of  $H_a$  resonances for **2** ( $CD_3CN$ ; nominally 5 mM) at 60 °C (dashed black) and -40 °C (solid orange) accentuating the partially resolved  $J(^{199}Hg^1H)$  coupling satellites.

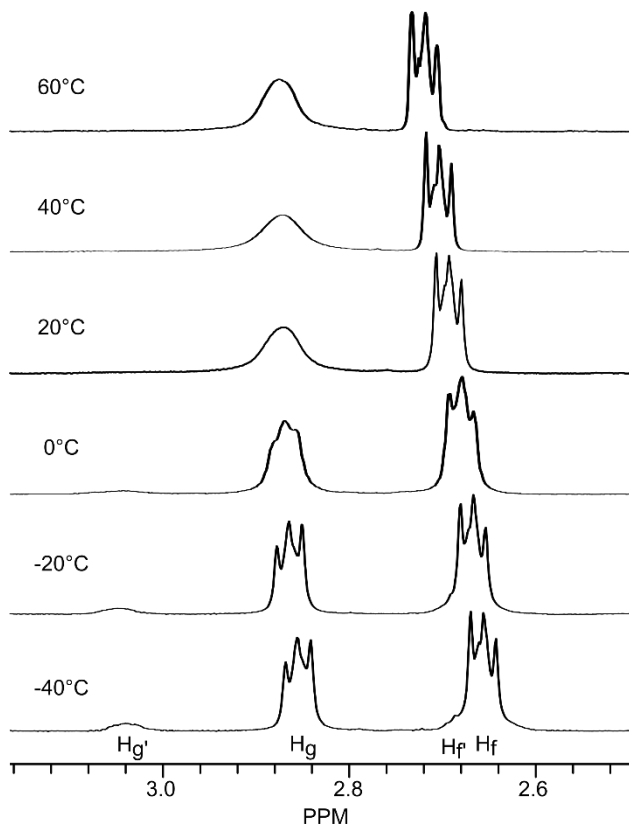

**Figure S5.** Ethylene proton NMR highlights of **2** ( $CD_3CN$ , nominally 5 mM) as a function of temperature. Resonances assigned to a minor environment in slow exchange on the chemical shift time scale at low temperature are labeled with primes.



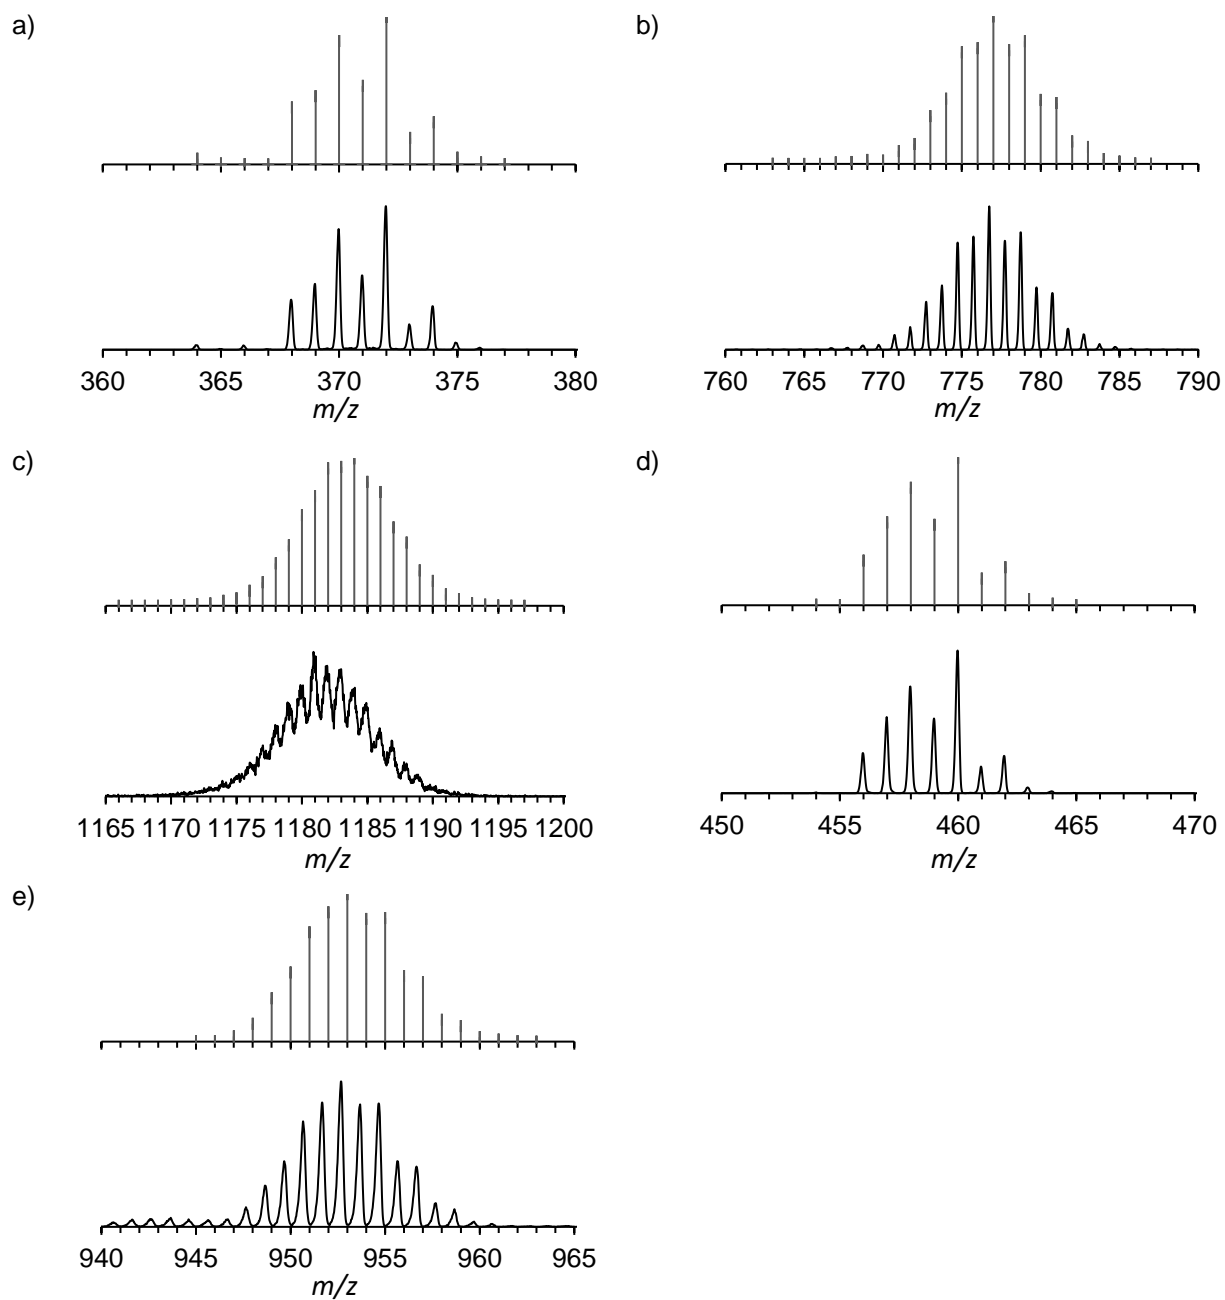

**Figure S6.** Calculated isotope pattern (top) and observed positive ion direct infusion ESI-MS ZoomScan isotope pattern (bottom) of (a)  $[\text{CdL}]^+$ , (b)  $[\text{Cd}_2\text{L}_2\text{Cl}]^+$ , (c)  $[\text{Cd}_3\text{L}_3\text{Cl}_2]^+$ , (d)  $[\text{HgL}]^+$  and (e)  $[\text{Hg}_2\text{L}_2\text{Cl}]^+$ .

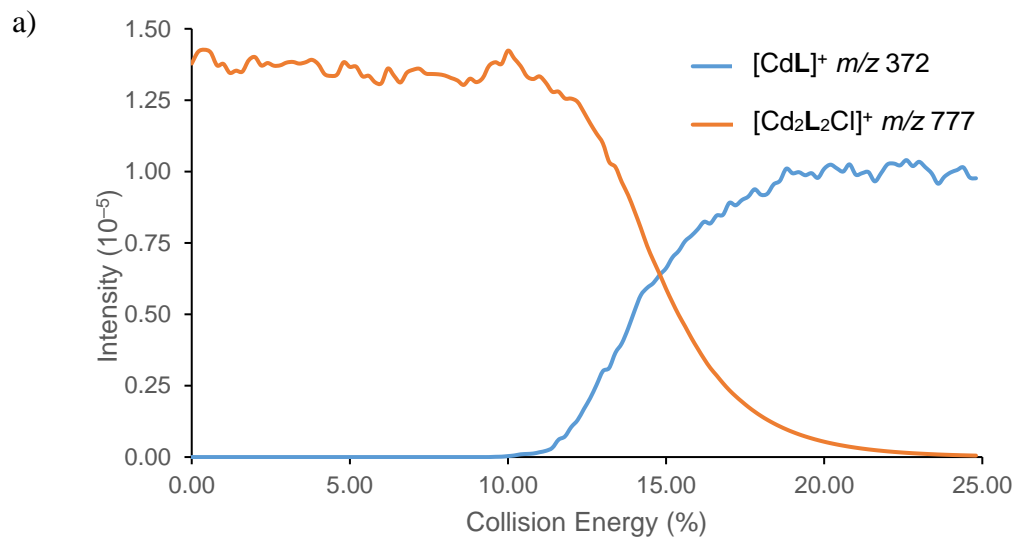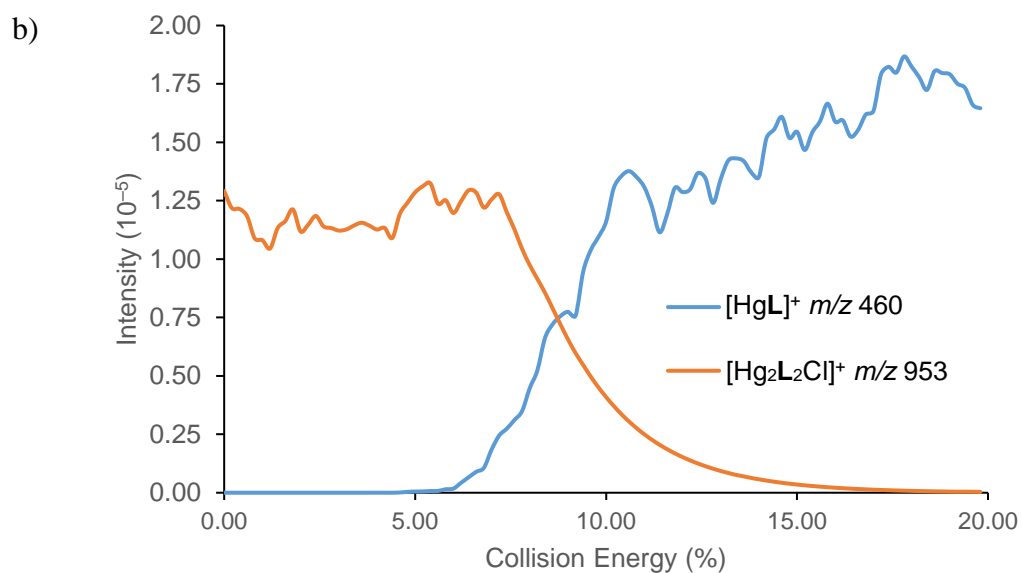

**Figure S67** Collision energy plots following the intensity of the most abundant isotopomers for a) [CdL]<sup>+</sup> and [Cd<sub>2</sub>L<sub>2</sub>Cl]<sup>+</sup> and b) [HgL]<sup>+</sup> and [Hg<sub>2</sub>L<sub>2</sub>Cl]<sup>+</sup>.

## References

- 1 G. M. Sheldrick, *Acta Crystallographica Section C*, 2015, **71**, 3-8.
- 2 D. B. Ninković, G. V. Janjić and S. D. Zarić, *Cryst. Growth Des.*, 2012, **12**, 1060-1063.
- 3 C. Janiak, *J. Chem. Soc. , Dalton Trans.*, 2000, 3885-3896.
- 4 I. Dance and M. Scudder, *CrystEngComm*, 2009, **11**, 2233-2247.
- 5 L. Loots and L. J. Barbour, in *The Importance of Pi-Interactions in Crystal Engineering*, ed. ed. E. R. T. Tiekink and J. Zukerman-Schpector, John Wiley & Sons, Ltd, West Sussex, UK, 2012, pp.109-124.
- 6 H. Kurosaki, T. Tawada, S. Kawasoe, Y. Ohashi and M. Goto, *Bioorg. Med. Chem. Lett.*, 2000, **10**, 1333-1337.
